# Supplementary material for: Cobaltabisdicarbollide anion receptor for enantiomer-selective membrane electrodes
Source: Royal Society of Chemistry journal article supplement (doi:10.1039/b910645f), 2009-01-01
Supplement: b910645f.pdf [file b910645f.pdf]

Electronic Supplementary Information

## Cobaltabisdicarbollide anion receptor for enantiomer-selective membrane electrodes

Anca-Iulia Stoica<sup>a,b</sup>, Clara Viñas<sup>a</sup> and Francesc Teixidor\*<sup>a</sup>

<sup>a</sup> Institut de Ciència de Materials de Barcelona  
CSIC Campus de la U.A.B., 08193 Bellaterra (Spain)  
Fax: (+34)935805729 E-mail: [teixidor@icmab.es](mailto:teixidor@icmab.es)

<sup>b</sup> On leave from the Department of Analytical Chemistry, Faculty of Chemistry, University of Bucharest 4-12 Regina Elisabeta Blvd., 030018 Bucharest, Romania, Fax: + 40 2 1 315 92 49; Tel: + 40 2 1 315 92 49; [anca\\_stoica2003@yahoo.com](mailto:anca_stoica2003@yahoo.com)

### Supporting Information

Experimental procedures, FTIR, NMR, MALDI-TOF values.

#### Experimental Section

**Instrumentation:** IR spectra ( $\nu$ ,  $\text{cm}^{-1}$ ; KBr pellets) were obtained on a Shimadzu FTIR-8300 spectrophotometer. The  $^1\text{H}$ - and  $^1\text{H}\{^{11}\text{B}\}$ -NMR (300.13 MHz),  $^{13}\text{C}\{^1\text{H}\}$ -NMR (75.47 MHz),  $^{11}\text{B}$ - and  $^{11}\text{B}\{^1\text{H}\}$ -NMR (96.29 MHz) spectra were recorded on a Bruker ARX 300 instrument equipped with the appropriate decoupling accessories. All NMR spectra were performed in  $d_6$ -acetone at 22°C. The  $^{11}\text{B}$ - and  $^{11}\text{B}\{^1\text{H}\}$ -NMR shifts were referenced to external  $\text{BF}_3 \cdot \text{OEt}_2$ , while the  $^1\text{H}$ ,  $^1\text{H}\{^{11}\text{B}\}$ , and  $^{13}\text{C}\{^1\text{H}\}$ -NMR shifts were referenced to  $\text{SiMe}_4$ . Chemical shifts are reported in units of parts per million downfield from reference, and all coupling constants in Hz. The mass spectra were recorded in the negative ion mode using a Bruker Biflex MALDI-TOF-MS [ $\text{N}_2$  laser;  $\lambda_{\text{exc}}$  337 nm (0.5 ns pulses); voltage ion source 20.00 kV (Uis1) and 17.50 kV (Uis2)].  $\text{Cs}[\text{Co}(1,2\text{-C}_2\text{B}_9\text{H}_{11})_2]$  was from KATCHEM and it was used as received.

### Synthesis of the D- and L- Tryptophan salt of cobaltabisdicarbollide, [H-Try][1].

Firstly, H[Co(1,2-C<sub>2</sub>B<sub>9</sub>H<sub>11</sub>)<sub>2</sub>] was obtained from Cs[Co(1,2-C<sub>2</sub>B<sub>9</sub>H<sub>11</sub>)<sub>2</sub>] (0.3000 g) and HCl 1M (15 mL), extracting the resulted product in ether (20mL). The extraction procedure was made by 3 times. The obtained compound was dried in vacuum atmosphere up to constant weight. D-, L- Try (0.0102g, 0.05 mmol) was dissolved in 5 mL of HCl 3M under stirring (solution 1). Secondly, the ion-pair compound [H-Try][1] was prepared by mixing 5 mL of 0.01M solution 1 with 0.0165g of H[Co(1,2-C<sub>2</sub>B<sub>9</sub>H<sub>11</sub>)<sub>2</sub>] under stirring resulting a yellow precipitate. The precipitate was filtered, washed with a solution of HCl and dried in vacuum atmosphere. FTIR,  $\nu$ : 3551 (OH), 3397 (NH), 3208 (NH<sub>3</sub><sup>+</sup>), 3041 (C<sub>c</sub>-H), 2926 (C<sub>aryl</sub>-H); 2565, (B-H), 1732 (C=O), 1599, 1490, 1459, 1439, 1427 (NH, NH<sub>3</sub><sup>+</sup>, C=O, OH). <sup>1</sup>H NMR ((CD<sub>3</sub>)<sub>2</sub>CO)  $\delta$ : 10.3 (m, N-H), 7.56 (d, <sup>3</sup>J(H,H)= 7.7, 1H, C<sub>aryl</sub>-H), 7.40 (d, <sup>3</sup>J(H,H)= 7.9, 3 + 1H, NH<sub>3</sub><sup>+</sup>, C<sub>aryl</sub>-H), 7.20 (dd, <sup>3</sup>J(H,H)= 7.9, <sup>3</sup>J(H,H)= 7.3, 1H, C<sub>aryl</sub>-H), 7.12 (dd, <sup>3</sup>J(H,H)= 7.7, <sup>3</sup>J(H,H)= 7.2, 1H, C<sub>aryl</sub>-H), 4.95 (dd, <sup>3</sup>J(H,H)= 11.9, <sup>3</sup>J(H,H)= 5.7, 1H, -CH), 3.95 (s, 4H, C<sub>c</sub>-H), 3.57 (dd, <sup>3</sup>J(H,H)= 16.1, <sup>3</sup>J(H,H)= 5.1, 1H, -CH<sub>2</sub>), 3.30 (dd, <sup>3</sup>J(H,H)= 16.2, <sup>3</sup>J(H,H)= 5.7, 1H, -CH<sub>2</sub>), 3.70-3.50 (m, 2H, CH<sub>2</sub>), 3.70-0.50 (br m, B-H). <sup>1</sup>H{<sup>11</sup>B} NMR ((CD<sub>3</sub>)<sub>2</sub>CO)  $\delta$ : 10.3 (m, N-H), 7.56 (d, <sup>3</sup>J(H,H)= 7.7, 1H, C<sub>aryl</sub>-H), 7.40 (d, <sup>3</sup>J(H,H)= 7.9, 3 + 1H, NH<sub>3</sub><sup>+</sup>, C<sub>aryl</sub>-H), 7.20 (dd, <sup>3</sup>J(H,H)= 7.9, <sup>3</sup>J(H,H)= 7.3, 1H, C<sub>aryl</sub>-H), 7.12 (dd, <sup>3</sup>J(H,H)= 7.7, <sup>3</sup>J(H,H)= 7.2, 1H, C<sub>aryl</sub>-H), 4.95 (dd, <sup>3</sup>J(H,H)= 11.9, <sup>3</sup>J(H,H)= 5.7, 1H, NH<sub>3</sub><sup>+</sup>-CH), 3.95 (s, 4H, C<sub>c</sub>-H), 3.57 (dd, <sup>3</sup>J(H,H)= 16.1, <sup>3</sup>J(H,H)= 5.1, 1H, -CH<sub>2</sub>), 3.30 (dd, <sup>3</sup>J(H,H)= 16.2, <sup>3</sup>J(H,H)= 5.7, 1H, -CH<sub>2</sub>), 4.08, 3.39, 2.99, 2.85, 2.72, 1.95, 1.62, 1.57 (br s, 18H, B-H). <sup>13</sup>C{<sup>1</sup>H} NMR ((CD<sub>3</sub>)<sub>2</sub>CO)  $\delta$ : 169.2 (COOH), 153.4, 136.9, 124.1, 122.7, 119.7, 118.4, 111.4, 104.0 (s, C<sub>aryl</sub>), 61.4, 53.9 (s, C<sub>c</sub>), 50.9 (s, CH), 22.4 (s, CH<sub>2</sub>). <sup>11</sup>B-NMR ((CD<sub>3</sub>)<sub>2</sub>CO)  $\delta$ : 7.3 (d, <sup>1</sup>J(B,H)= 140, 2B), 2.1 (d, <sup>1</sup>J(B,H)= 143, 2B), -4.6 (d, <sup>1</sup>J(B,H)= 145, 4B); -5.3 (d, <sup>1</sup>J(B,H)= 133, 4B), -16.6 (d, <sup>1</sup>J(B,H)= 154, 4B), -22.1 (d, <sup>1</sup>J(B,H)=

170, 2B). MALDI-TOF at the cathode, (m/z): 187.83 (M-17; 100%), 204.90 (M; 16%), 244.89 (M-40, 89%). MALDI-TOF at the anode, (m/z): 324.26 ([Co(1,2-C<sub>2</sub>B<sub>9</sub>H<sub>11</sub>)<sub>2</sub>]<sup>-</sup>, 100%).

**Synthesis of the D- and L- Histidine salt of cobaltabisdicarbollide, [H<sub>2</sub>-His][1]<sub>2</sub>.**

Firstly, H[Co(1,2-C<sub>2</sub>B<sub>9</sub>H<sub>11</sub>)<sub>2</sub>] was obtained from Cs[Co(1,2-C<sub>2</sub>B<sub>9</sub>H<sub>11</sub>)<sub>2</sub>] (0.3000 g) and HCl 1M (15 mL), extracting the resulted product in ether (20mL). The extraction procedure was made by 3 times. The obtained compound was dried in vacuum atmosphere up to constant weight. D-, L- Histidine (0.0388g, 0.25 mmol) was dissolved in 5 mL of HCl 3M under stirring (solution 1). Secondly, the ion-pair compound [H<sub>2</sub>-His][1]<sub>2</sub> was prepared by mixing 5 mL of 0.01M solution 1 with 0.0165 g of H[Co(1,2-C<sub>2</sub>B<sub>9</sub>H<sub>11</sub>)<sub>2</sub>] under stirring resulting a yellow precipitate. The precipitate was filtered, washed with a diluted solution of HCl and dried in vacuum atmosphere.

FTIR,  $\nu$ : 3585, 3555 (OH), 3374 (NH), 3331 (NH<sub>3</sub><sup>+</sup>), 3039 (C<sub>c</sub>-H), 2978, 2934, 2895, 2862 (C<sub>aryl</sub>-H, C<sub>alkyl</sub>-H); 2565, 2547 (B-H), 1734 (C=O), 1624, 1596, 1526 (N-C=O, N<sup>+</sup>-H, NH<sub>3</sub><sup>+</sup>). <sup>1</sup>H NMR ((CD<sub>3</sub>)<sub>2</sub>CO)  $\delta$ : 13.37 (br s, ), 9.23 (s, <sup>1</sup>H, C<sub>aryl</sub>-H), 7.80 (s, 1H, C<sub>aryl</sub>-H), 5.69 (br s, 3H, NH<sub>3</sub><sup>+</sup>), 4.90 (m, 1H, CH), 3.94 (s, 8H, C<sub>c</sub>-H), 3.86-3.64 (m, 2H, CH<sub>2</sub>), 3.5-0.5 (br m, B-H). <sup>1</sup>H{<sup>11</sup>B} NMR ((CD<sub>3</sub>)<sub>2</sub>CO):  $\delta$ : 13.37 (br s, ), 9.23 (s, <sup>1</sup>H, C<sub>aryl</sub>-H), 7.80 (s, 1H, C<sub>aryl</sub>-H), 5.69 (br s, 3H, NH<sub>3</sub><sup>+</sup>), 4.90 (m, 1H, CH), 3.94 (s, 8H, C<sub>c</sub>-H), 3.86-3.64 (m, 2H, CH<sub>2</sub>), 3.37 (br s, 4H, B-H), 2.97 (br s, 4H, B-H), 2.70 (br s, 8H, B-H), 2.01 (br s, 8H, B-H), 1.61 (br s, 4H, B-H), 1.56 (br s, 8H, B-H). <sup>13</sup>C{<sup>1</sup>H} NMR ((CD<sub>3</sub>)<sub>2</sub>CO)  $\delta$ : 167.0 (s, C=O), 135.1, 127.4, 119.0 (s, C<sub>aryl</sub>), 59.2, 52.7(s, C<sub>c</sub>), 51.0 (s, CH), 26.0 (s, CH<sub>2</sub>). <sup>11</sup>B-NMR ((CD<sub>3</sub>)<sub>2</sub>CO)  $\delta$ : 7.2 (d, <sup>1</sup>J(B,H)= 143, 2B), 2.0 (d, <sup>1</sup>J(B,H)= 141, 2B), -4.9 (d, <sup>1</sup>J(B,H)= 153, 4B), -5.4 (d, <sup>1</sup>J(B,H)= 133, 4B), -16.6 (d, <sup>1</sup>J(B,H)= 154, 4B), -22.1 (d, <sup>1</sup>J(B,H)= 168, 2B). MALDI-TOF at the cathode (m/z): 155.25 (M; 32%),

152.36 (M+3, 100%), 132.74 (M-23, 71%), 164.34 (M+9; 57%), 178.33 (M+23; 21%).

MALDI-TOF at the anode (m/z): 324.23 ([Co(1,2-C<sub>2</sub>B<sub>9</sub>H<sub>11</sub>)<sub>2</sub>]<sup>-</sup>, 100%).

**Synthesis of the L-Arginine salt of cobaltabisdicarbollide, [H-Arg][1].** Firstly, H[Co(1,2-C<sub>2</sub>B<sub>9</sub>H<sub>11</sub>)<sub>2</sub>] was obtained from Cs[Co(1,2-C<sub>2</sub>B<sub>9</sub>H<sub>11</sub>)<sub>2</sub>] (0.3000 g) and HCl 1M (15 mL), extracting the resulted product in ether (20mL). The extraction procedure was made by 3 times. The obtained compound was dried in vacuum atmosphere up to constant weight. L- Arg (0.009g, 0.05 mmol) was dissolved in 5 mL of HCl 3M under stirring (solution 1). Secondly, the ion-pair compound [H-Arg][1] was prepared by mixing 5 mL of 0.01M solution 1 with 0.0165g of H[Co(1,2-C<sub>2</sub>B<sub>9</sub>H<sub>11</sub>)<sub>2</sub>] under stirring resulting a yellow precipitate. The precipitate was filtered, washed with a solution of HCl and dried in vacuum atmosphere. FTIR,  $\nu$ : 3594 (OH), 3453, 3365, 3216 (NH), 3036 (C<sub>c</sub>-H), 2926 (C<sub>aryl</sub>-H); 2566, 2544 (B-H), 1736 (C=O), 1659, 1645, 1615, (NH, NH<sub>3</sub><sup>+</sup>, C=O, OH). <sup>1</sup>H NMR ((CD<sub>3</sub>)<sub>2</sub>CO)  $\delta$ : 8.3, 7.4, 7.0, 4.5 (br s, 4H, N-H), 3.95 (s, 5H, 4 C<sub>c</sub>-H + 1 CH), 3.57 (m, 2H, -CH<sub>2</sub>), 3.70-0.50 (br m, B-H), 2.28-2.25 (m, 2H, CH<sub>2</sub>). <sup>1</sup>H{<sup>11</sup>B} NMR ((CD<sub>3</sub>)<sub>2</sub>CO)  $\delta$ : 8.3, 7.4, 7.0, 4.5 (br s, 4H, N-H), 3.95 (s, 5H, 4 C<sub>c</sub>-H + 1 CH), 3.57 (m, 2H, -CH<sub>2</sub>), 4.08, 3.39, 2.99, 2.85, 2.72, 1.95, 1.62, 1.57 (br s, 18H, B-H). <sup>13</sup>C{<sup>1</sup>H} NMR ((CD<sub>3</sub>)<sub>2</sub>CO)  $\delta$ : 59.8(s, CH), 50.9 (s, C<sub>c</sub>), 40.9 (s, CH<sub>2</sub>), 24.6 (s, CH<sub>2</sub>). <sup>11</sup>B-NMR ((CD<sub>3</sub>)<sub>2</sub>CO)  $\delta$ : 7.3 (d, <sup>1</sup>J(B,H)= 140, 2B), 2.1 (d, <sup>1</sup>J(B,H)= 143, 2B), -4.7 (d, <sup>1</sup>J(B,H)= 145, 4B); -5.3 (d, <sup>1</sup>J(B,H)= 133, 4B), -16.6 (d, <sup>1</sup>J(B,H)= 154, 4B), -22.1 (d, <sup>1</sup>J(B,H)= 170, 2B). MALDI-TOF at the cathode, (m/z): 173.88 (Arg; 100%), 174.90 (H-Arg<sup>+</sup>; 10%). MALDI-TOF at the anode, (m/z): 323.27 ([Co(1,2-C<sub>2</sub>B<sub>9</sub>H<sub>11</sub>)<sub>2</sub>]<sup>-</sup>, 100%).

**Table S.1.-** Electrode characteristics for L-Arg

| Plasticizer             | DBP                                         | DEHP                                        |
|-------------------------|---------------------------------------------|---------------------------------------------|
| Slope (mV/decade)       | 45.8                                        | 37.7                                        |
| Correlation coefficient | 0.993                                       | 0.991                                       |
| Concentration range (M) | $5.00 \cdot 10^{-6}$ - $1.00 \cdot 10^{-1}$ | $1.00 \cdot 10^{-5}$ - $1.00 \cdot 10^{-1}$ |
| Detection limit (M)     | $3.00 \cdot 10^{-6}$                        | $5.00 \cdot 10^{-5}$                        |
| Time response/s         | <5                                          | < 5                                         |
| Lifetime/day            | > 45                                        | > 45                                        |

**Table S.2.-** ISE Selectivity coefficients for L-Arginine electrode.

| Interfering species | $\lg K^{\text{pot}}_{\text{L-Arg/B}}$ | $\lg K^{\text{pot}}_{\text{L-Arg/B}}$ |
|---------------------|---------------------------------------|---------------------------------------|
|                     | DBP                                   | DEHP                                  |
| glycine             | -5.04                                 | -5.46                                 |
| $\beta$ -alanine    | -6.54                                 | -4.40                                 |
| DL-leucine          | -6.11                                 | -5.88                                 |
| DL-methionine       | -5.05                                 | -5.72                                 |
| L-arginine          | -                                     | -                                     |
| L-histidine         | -4.50                                 | -5.02                                 |
| DL-tryptophan       | -6.76                                 | -5.80                                 |
